# Supplementary material
Source: publisher site journal article supplement (https://neobiota.pensoft.net/article/21470/download/suppl/34/)
Supplement: Supplementary file 1

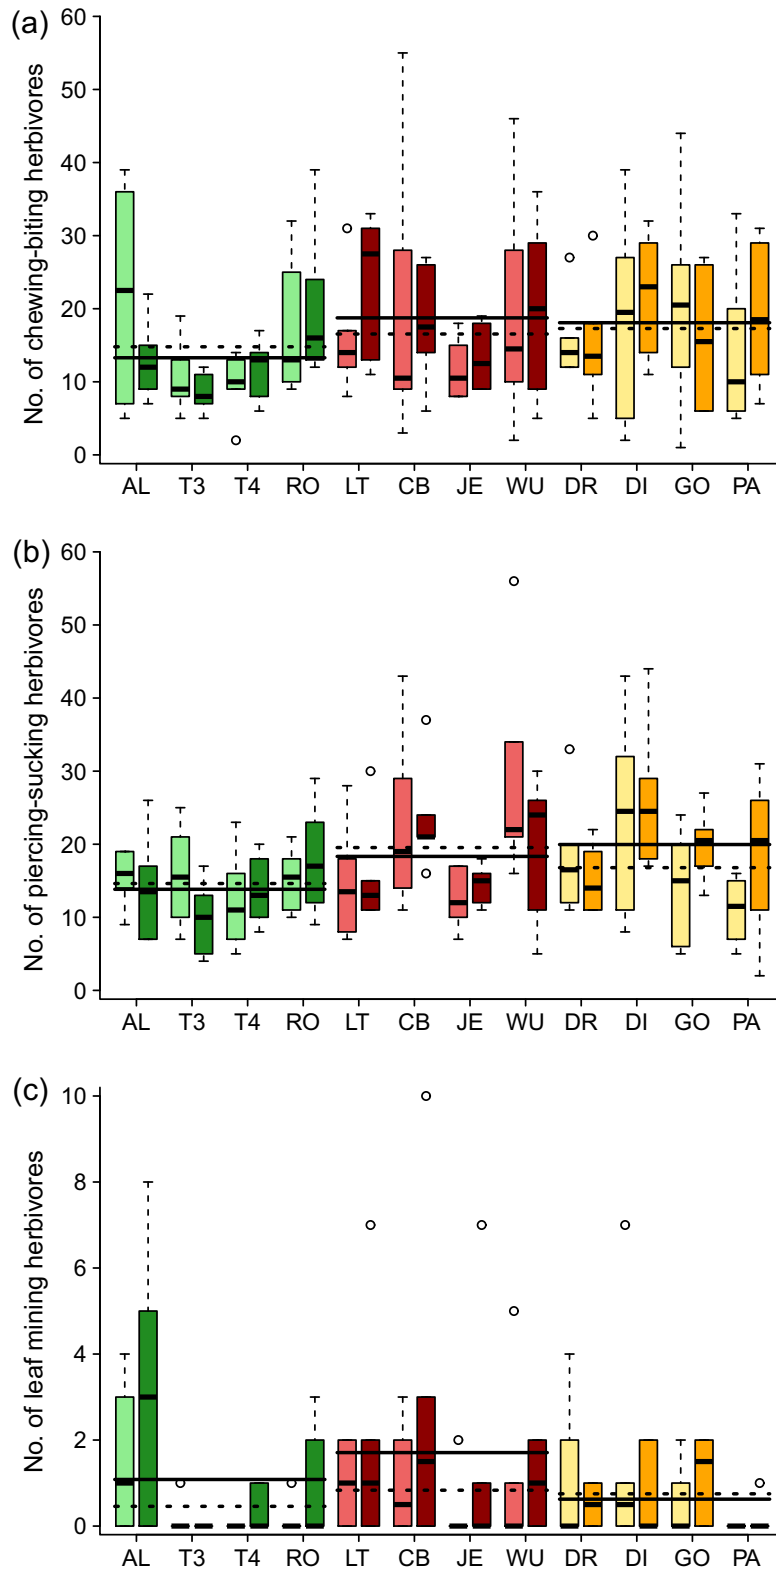

**Figure S3.** Herbivore loads of *Bunias orientalis* plants. Twelve populations of native (green), invasive (red), and naturalised (yellow) status were grown in a field common garden under two nitrate-fertilisation treatments, low (light shade) and high (dark shade) ( $n = 6$  per population and fertilisation treatment; for population codes see Table 1). Cumulative number of (a) chewing-biting, (b) piercing-sucking and (c) leaf mining herbivorous insect morphotypes (counted ten times over six weeks) in the first year. Box plots: median, 5th, 25th, 75th, 95th percentiles; open dots: outliers. Lines along four populations of similar status: status mean values for low (dashed) and high (solid) fertilisation treatments.
